# Supplementary material for: New estimates of sulfate diffusion rates in the EPICA Dome C ice core
Source: Copernicus journal article supplement (doi:10.5194/egusphere-2024-19), 2024-02-20
Supplement: Supplementary file 2 [file egusphere-2024-19-supplement.zip]

Archive with 2 entries (2 files):
- supplement/RRhodes_EDCsulfate_supplement.pdf
- supplement/RRhodes_TableS1_EDC_SO4_diffrates.xlsx
