# Supplementary material for: New estimates of sulfate diffusion rates in the EPICA Dome C ice core
Source: Copernicus journal article supplement (doi:10.5194/egusphere-2024-19), 2024-02-20
Supplement: Supplementary file 2 [file egusphere-2024-19-supplement.zip › supplement/RRhodes_TableS1_EDC_SO4_diffrates.xlsx]

## Sheet: Table S1 - EDC sulfate peaks
Age (yrBP)	Depth (m)	Peak width (m)	Peak width (yr)	SO4 peak height flux (ug m-2 yr-1)	SO4 peak height conc (ug kg-1)	Total SO4 flux (ug m2)	Effective diffusion rate (m2 yr-1)
126	12.151	0.519	9	18101.9	605.7	62703.3	1e-06
497	29.57	0.34	8	10650.4	398.58	39387.6	1e-06			Table S1: EPICA Dome C volcanic sulfate peaks used in forward model to estimate effective diffusion rates.
696	37.921	0.41	10	18826.1	637.11	83937.7	1e-06			Rhodes et al., submitted to Climate of the Past, Jan 2024.
786	41.331	0.31	8	7825.46	310.78	29327.1	8.68511e-07
1278	60.221	0.45	13	6677.43	292.62	47250.2	1e-06
1381	64.001	0.41	11	8163.22	324.42	32195.3	5.68987e-07
1652	73.391	0.37	11	8240.03	343.39	34601.9	4.94171e-07
2392	96.932	0.36	13	12886.5	497.3	68894	4.94171e-07
3523	130.582	0.27	9	9839.06	352.39	39799.6	2.44205e-07
4006	144.733	0.24	9	8764.01	324.2	41081.5	2.81177e-07
4872	169.244	0.28	10	7341.96	282.51	36222.7	2.44205e-07
6296	208.555	0.4	15	8016.35	305.96	63886	5.68987e-07
6339	209.695	0.42	15	12635.5	429.74	55164.5	1.3895e-07
6492	213.805	0.23	8	10758.7	365.76	42906	1.3895e-07
6565	215.745	0.34	14	25429.4	802.95	103921	1.20679e-07
7193	232.556	0.33	13	6150.56	266.72	30389.8	1.59986e-07
7600	243.126	0.23	8	17830.8	536.12	67557.5	1.04811e-07
7894	251.206	0.25	10	7475.01	286.09	30913.9	1.04811e-07
8204	259.247	0.24	10	6749.59	295.33	28203.8	7.90604e-08
8641	270.387	0.33	12	15284.8	505.87	50309.6	5.17947e-08
9893	305.508	0.32	12	5169.71	218.6	32328.1	2.12095e-07
10143	312.658	0.33	11	13613	411.66	55836.6	1.04811e-07
10456	321.849	0.57	20	5338.33	218.44	36272.9	2.44205e-07
11256	344.77	0.36	13	5228.67	217.17	33446.8	2.12095e-07
11541	352.8	0.4	14	11916.9	383.37	74658.5	2.12095e-07
13027	387.241	0.37	20	6552.16	471.65	47877.7	1.04811e-07
13136	389.261	0.41	22	10881.7	705.63	83341.4	1.20679e-07
13334	392.951	0.21	11	5071.69	389.19	29124	5.96362e-08
13923	404.102	0.32	17	6017.72	442.13	40198.6	9.10298e-08
15141	428.132	0.24	13	4336.27	357.46	27512.3	6.86649e-08
15348	432.002	0.3	16	4334.03	359.81	35832.8	1.20679e-07
15683	438.103	0.28	17	11431.8	792.71	81186.9	6.86649e-08
16504	451.523	0.29	19	6267.64	568.89	47492.3	5.96362e-08
16664	453.993	0.25	16	17663.8	1297.71	88571.4	2.55955e-08
19646	492.554	0.32	25	6219.71	674.49	75440.3	1.04811e-07
19804	494.655	0.241	18	12948	1131.8	116546	5.96362e-08
20684	506.015	0.24	18	5041.08	571.9	38165.7	3.90694e-08
20993	510.075	0.32	25	3652.11	465.53	48528.7	1.20679e-07
21184	512.581	0.25	19	4199.22	495.83	38004.6	5.96362e-08
23422	540.336	0.309	26	2925.9	453.99	40500.7	1.04811e-07
23558	541.923	0.179	16	2969.41	460.1	27122.8	3.90694e-08
24026	547.312	0.239	23	3980.72	561.93	39491.1	3.90694e-08
24593	553.31	0.219	21	2268.79	443.49	25326.5	4.49843e-08
25697	564.318	0.169	18	5749.2	818.6	33164.2	9.54095e-09
26066	567.921	0.17	18	4138.85	682.93	47874.8	4.49843e-08
28004	587.432	0.189	18	3997.6	523.15	26439.3	1.45635e-08
28545	593.31	0.189	18	4703.1	600.8	41600.4	2.55955e-08
29737	606.834	0.17	14	6555.67	656.25	33606.6	1.09854e-08
30526	615.895	0.16	15	4972.31	629.81	38333.6	1.9307e-08
31491	626.465	0.229	21	6807.66	810.25	66618	3.39322e-08
31843	630.137	0.27	26	2501.46	398.49	28392.9	3.90694e-08
32046	632.273	0.36	35	17298	1724.49	202833	3.90694e-08
32416	636.326	0.259	23	7207.91	723.46	75439.2	3.90694e-08
32510	637.403	0.259	23	2355.91	339.06	28151	5.17947e-08
33190	644.728	0.3	31	2620.66	416.98	30675.1	3.39322e-08
33238	645.197	0.3	30	6605.25	774.31	97702.5	5.96362e-08
34819	661.805	0.209	21	6764.35	759.58	57176.2	1.9307e-08
35660	670.977	0.239	21	2783.25	363.26	25409.1	2.94705e-08
36200	677.134	0.19	17	14164.2	1242.7	105812	1.9307e-08
36261	677.833	0.26	23	3135.39	392.9	29238.8	2.94705e-08
36418	679.52	0.26	24	3171.64	426.79	33784.9	3.39322e-08
36831	684.031	0.359	33	1953.33	312.58	35521.2	1.04811e-07
37274	689.07	0.24	21	5377.6	563.22	49762.9	2.94705e-08
38168	700.548	0.26	17	4296.19	389.43	28176.5	2.223e-08
38211	701.197	0.31	20	6598.12	526.42	52986.8	3.39322e-08
38295	702.503	0.339	22	6688.34	524.46	56804.7	4.49843e-08
38955	711.656	0.449	32	3448.78	334.02	39759.7	6.86649e-08
39483	719.011	0.28	22	4144.08	441.48	42643.8	3.90694e-08
39872	723.801	0.259	22	6076.32	621.01	60519.8	3.39322e-08
40075	726.257	0.24	18	5429.66	536.35	43781.2	2.55955e-08
41022	737.555	0.229	20	7575.13	736.1	53633.5	1.45635e-08
41059	737.973	0.209	18	2065.07	329.96	33372	7.90604e-08
41159	739.161	0.2	17	7840.21	739.18	60467.3	1.9307e-08
41769	746.027	0.389	38	1940.17	353.58	36729	9.10298e-08
41978	748.144	0.209	21	15848.3	1545.22	122821	1.26486e-08
42195	750.31	0.209	21	14618.2	1434.15	123575	1.67683e-08
42572	754.311	0.32	30	2632.07	380.56	45253.6	7.90604e-08
43093	760.14	0.229	19	4914.08	510.68	52401	3.39322e-08
43508	764.891	0.21	19	6029.05	636.99	50206.8	1.9307e-08
44685	777.644	0.2573	23	30899.6	2539.4	286448	2.223e-08
45514	787.16	0.1901	16	8454.73	743.84	73055.8	2.55955e-08
45888	791.874	0.222	17	9826.5	791.56	66416.3	1.67683e-08
46401	798.5	0.2906	23	17249	1266.68	123935	1.67683e-08
46917	805.216	0.1602	14	5116.23	530.27	35152.3	1.45635e-08
47213	808.704	0.1912	16	3794.43	442.04	26970.1	1.45635e-08
48134	818.409	0.1861	21	2473.06	473.88	25503.1	1.67683e-08
48969	825.982	0.1851	21	6006.52	771.77	50448.9	1.09854e-08
49237	828.544	0.1752	18	5498.98	699.92	45809.3	1.26486e-08
50592	841.611	0.151161	15	3143.76	432.08	26390.9	1.45635e-08
51252	848.317	0.164165	16	3931.33	501.04	40162.2	2.223e-08
52036	856.228	0.17816	18	2518.32	373.66	26005.7	2.223e-08
52086	856.76	0.22268	20	7273.91	734.17	67610.3	1.9307e-08
53394	871.43	0.227561	19	7369.97	654.87	74787.8	2.94705e-08
53635	874.225	0.166142	15	14899.3	1216.37	112604	1.26486e-08
53899	877.448	0.143645	11	4234.81	428.89	33312.6	1.67683e-08
54140	880.523	0.144548	11	7239.61	604.12	31070	4.71487e-09
55081	891.356	0.250948	24	3258.12	383.09	36122	2.55955e-08
55972	900.91	0.148223	14	5896.85	598.17	37758.6	8.28643e-09
57299	914.42	0.196255	19	12387.2	1111.49	98300.7	1.26486e-08
57744	919.166	0.219494	19	8285.18	739.9	53446.2	9.54095e-09
57899	920.946	0.176107	16	3712.55	414.24	26282.3	1.09854e-08
58431	927.113	0.236793	21	8618.11	774.93	69992.6	1.45635e-08
58615	929.197	0.214991	18	4019.61	427.31	36825	1.9307e-08
59493	939.558	0.225095	19	5710.86	505.69	34333	8.28643e-09
59633	941.288	0.151873	12	5604.81	462.67	34284.6	9.54095e-09
59895	944.538	0.185122	15	3931.85	389.72	35780.2	1.9307e-08
60026	946.102	0.167848	14	6759.3	567.69	40039.9	8.28643e-09
60941	956.922	0.161448	13	4050.81	392.11	26176	1.09854e-08
61395	961.997	0.154352	13	8377.38	735.74	47881	6.25055e-09
61612	964.444	0.202138	18	3230.86	373.8	26441	1.45635e-08
62163	970.634	0.153819	13	3934.08	423.65	25742.6	9.54095e-09
62625	975.674	0.252465	23	6760.8	655.47	64159.6	1.67683e-08
63047	980.08	0.195963	20	2033.38	329.74	28331.4	3.39322e-08
63587	985.404	0.176094	18	4878.59	601.3	38021.6	8.28643e-09
64126	990.381	0.150938	17	4225.6	573.65	29889.9	6.25055e-09
64422	992.958	0.135882	14	3987.58	534.98	29554.7	7.19686e-09
64467	993.366	0.194117	21	3380.51	469.27	30056.4	1.09854e-08
65153	1000.09	0.214868	24	3379.43	468.82	35362.2	1.45635e-08
65219	1000.68	0.174861	19	5622.13	649.37	48765.3	9.54095e-09
65905	1006.66	0.137841	17	3702.16	528.96	31343.2	8.28643e-09
66743	1013.72	0.125777	16	4816.59	635.52	34591.6	5.42868e-09
67446	1019.43	0.21962	27	21410.9	2172.7	204200	9.54095e-09
68311	1026.8	0.144979	17	6714.89	783.95	65788.8	1.09854e-08
68436	1027.86	0.077173	10	5710.2	703.26	29344.4	2.6827e-09
69856	1040.49	0.179804	19	5262.22	567.49	47207.4	1.26486e-08
70008	1041.9	0.117449	12	4814.44	574.36	32851.8	6.25055e-09
70055	1042.34	0.159595	17	2957.23	426.93	31449.7	1.45635e-08
70286	1044.34	0.151933	17	3051.87	444.36	27058	9.54095e-09
70487	1046.07	0.159565	18	5029.62	609.21	50554.4	1.26486e-08
71694	1057.97	0.170036	15	4093.18	397.48	28748.7	9.54095e-09
72215	1063.95	0.213587	20	4933.28	460.64	41453.2	1.26486e-08
72280	1064.65	0.304235	29	8752.3	727.71	92337	2.223e-08
72817	1070.39	0.190237	18	4408.17	433.46	39118.7	1.45635e-08
72891	1071.19	0.186094	17	10784.7	860.18	77924.8	9.54095e-09
73663	1078.94	0.189735	21	6143.68	623.57	56667.9	1.26486e-08
73746	1079.72	0.164945	18	6021.3	606.2	46917.4	8.28643e-09
73912	1081.27	0.225371	24	14613.6	1206.21	125761	1.09854e-08
74229	1084.39	0.228265	23	3939.82	417.39	41609.3	1.9307e-08
74923	1091.59	0.179737	17	5366.99	488.77	38609.5	9.54095e-09
75488	1097.96	0.169407	15	5946.52	476.13	39150.9	9.54095e-09
75544	1098.6	0.249607	22	3635.69	341.13	33644.9	1.9307e-08
76096	1105.22	0.143543	12	4079.79	383.08	29888.3	1.09854e-08
76535	1109.96	0.135787	13	3498.77	355.59	25854.5	9.54095e-09
77247	1116.89	0.21085	23	2386.9	333.86	36640.4	3.39322e-08
79007	1134.94	0.176659	17	4315.71	432.31	30953.9	8.28643e-09
79509	1140.54	0.120588	11	39712.5	2550.69	140575	2.02359e-09
80512	1152.74	0.182907	14	4193.87	349.14	28840	1.26486e-08
80835	1156.9	0.173963	14	6497.28	470.78	44782.7	1.09854e-08
81330	1163.21	0.182188	14	11561.7	740.96	74795.5	9.54095e-09
81380	1163.84	0.165574	13	4335.39	347.22	30749.4	1.26486e-08
81663	1167.49	0.195834	15	4271.91	335.5	25085.9	8.28643e-09
82107	1173.03	0.198718	17	7013.07	510.1	55291.4	1.45635e-08
82348	1176.08	0.206061	17	10578.8	693.25	68277.9	9.54095e-09
82568	1178.95	0.205084	15	10060.1	608.66	57478.2	8.28643e-09
84623	1206.55	0.265263	21	17935.5	1034.18	118240	9.54095e-09
84894	1210.06	0.198738	15	6082.07	427.45	38943.6	9.54095e-09
84946	1210.72	0.176924	14	5522.35	406.05	36413.9	1.09854e-08
85259	1214.61	0.188947	15	4414.75	335.48	26752.3	8.28643e-09
86788	1232.81	0.17331	15	3867.98	360.59	36743	1.9307e-08
87315	1238.71	0.252312	23	15891.8	1099.13	127008	1.09854e-08
89623	1262.85	0.179836	17	3420.59	374.37	27353.6	9.54095e-09
89825	1264.96	0.143943	14	4161.77	401.15	27492.1	7.19686e-09
90046	1267.42	0.232491	21	10011.6	733.23	95094.1	1.45635e-08
90392	1271.19	0.220805	19	27724.8	1720.91	178259	7.19686e-09
91069	1278.59	0.180559	17	4804.21	454.71	36756.4	9.54095e-09
91123	1279.13	0.206924	21	5096.83	492.24	42582.8	9.54095e-09
91768	1285.88	0.179375	18	6839.85	563.8	53061.4	9.54095e-09
92311	1291.61	0.158207	15	4349.28	401.47	32248.4	9.54095e-09
93332	1303.14	0.148163	13	7065.5	531.91	48521.7	8.28643e-09
93533	1305.41	0.17977	15	5180.33	430.23	32201.1	7.19686e-09
94055	1311.45	0.211371	19	3100.87	319.28	35359.4	2.55955e-08
94134	1312.35	0.209223	18	10563.6	706.38	65522.2	7.19686e-09
94288	1314.12	0.167244	14	5572.52	429.41	37380.3	8.28643e-09
94477	1316.27	0.268839	24	11130.1	721.09	82909.4	1.09854e-08
94641	1318.1	0.158331	14	3684.2	336.42	26903.5	9.54095e-09
95360	1326.19	0.137078	11	5078.46	410.79	33130	8.28643e-09
95604	1328.74	0.183424	17	2645.36	296.96	26500.2	1.67683e-08
95966	1332.47	0.258723	25	9607.08	681.24	89891.4	1.45635e-08
96268	1335.62	0.217137	22	4249.55	384.34	48978.7	2.223e-08
96665	1339.71	0.191228	19	4661.13	406.21	44424.5	1.45635e-08
96962	1342.71	0.185803	19	10231.5	734.51	62366	5.42868e-09
96994	1343.04	0.183804	18	6851.17	544.96	71064.1	1.67683e-08
97977	1353.24	0.157879	14	13098.4	830.76	77630.4	6.25055e-09
98498	1358.9	0.210265	19	4157.13	352.04	33322.9	1.09854e-08
99318	1368.09	0.181942	17	4035.64	337.31	28093.3	8.28643e-09
99471	1369.76	0.193798	18	7024.24	484.41	56010.8	1.09854e-08
99820	1373.89	0.174821	14	7493.21	487.53	46408.2	7.19686e-09
99951	1375.45	0.226556	19	6589.99	440.49	46627.8	9.54095e-09
100080	1377.02	0.199637	16	4147.05	313.77	30264.2	1.09854e-08
101424	1394.15	0.229346	18	4707.59	332.19	38381.3	1.45635e-08
102251	1404.28	0.191697	16	6977.78	456.93	43272.2	7.19686e-09
102874	1411.21	0.14	14	3964.29	370.36	28083.2	6.25055e-09
102948	1411.94	0.240861	25	13865.4	961.09	151164	1.67683e-08
103140	1413.82	0.212667	22	2619.7	287.24	26552.3	1.26486e-08
103530	1417.81	0.183023	18	4257.18	356.54	36529.7	1.09854e-08
104384	1426.86	0.154182	14	3736.68	314.11	28641	9.54095e-09
104600	1429.12	0.171385	16	11345.6	723.23	95262.6	1.09854e-08
104716	1430.34	0.243069	23	6593.55	467.47	51322.7	9.54095e-09
104918	1432.47	0.212281	20	10100.9	671.12	74494.3	8.28643e-09
105076	1434.12	0.175287	17	3758.46	305.12	26512	8.28643e-09
105604	1439.85	0.174414	16	3760.86	299.64	26917.3	9.54095e-09
105923	1443.44	0.198055	19	4518.92	350.09	36885.4	1.09854e-08
106339	1447.73	0.216179	22	9122.85	630.79	69661.4	8.28643e-09
106674	1451	0.172979	17	8609.4	615.94	64995.4	8.28643e-09
106818	1452.36	0.15323	17	4637.25	398.67	34670.9	7.19686e-09
107077	1454.68	0.131166	15	3116.61	320.69	25000.8	7.19686e-09
107228	1455.96	0.189841	22	8779.7	702.52	76411.5	8.28643e-09
107299	1456.55	0.170856	21	7145.13	602.41	55428.8	6.25055e-09
107486	1458.1	0.26895	33	7154.67	596.75	85061.1	1.45635e-08
108483	1466.29	0.19717	24	3411.28	347.62	42711.5	1.67683e-08
108979	1470.48	0.196291	23	5524.15	471.61	56920.5	1.26486e-08
110235	1480.96	0.153412	19	8183.27	655.98	90560	1.26486e-08
110467	1482.81	0.186932	24	4004.48	383.65	42725.4	1.26486e-08
110979	1486.83	0.185645	24	3439.51	366.64	35280.5	1.09854e-08
111284	1489.18	0.183427	23	8795.7	701.85	86634.7	9.54095e-09
111489	1490.77	0.159939	21	2295.46	270.39	26535.2	1.45635e-08
111966	1494.57	0.113012	16	4031.3	391.26	33971.2	7.19686e-09
112005	1494.88	0.150682	20	3026.3	328.05	26675.3	8.28643e-09
112960	1502.64	0.172187	20	5125.34	399.79	56892.8	1.67683e-08
113371	1506.29	0.168897	19	4941.22	370.96	33255.4	6.25055e-09
113701	1509.24	0.214117	23	1762.29	208.95	26559.4	3.39322e-08
113793	1510.08	0.276344	31	30395.1	1758.68	310836	1.45635e-08
113871	1510.78	0.190855	21	12486.5	804.73	100767	8.28643e-09
113952	1511.5	0.212393	22	8478.1	531.23	65220.6	9.54095e-09
114853	1520.34	0.150763	15	3184.19	255.52	26521	1.09854e-08
115394	1525.74	0.228759	23	5036.1	333.19	43173.8	1.26486e-08
115507	1526.88	0.242711	23	2357.06	217.11	30024	2.94705e-08
116058	1532.77	0.139873	13	4461.35	298.79	29815.8	8.28643e-09
116133	1533.6	0.132774	12	4042.5	269.69	25576.3	8.28643e-09
116577	1538.61	0.248769	21	10990.6	526.94	88130.5	1.45635e-08
116903	1542.39	0.14501	12	6974.22	359.56	46487.7	9.54095e-09
117256	1546.54	0.132042	11	5606.87	297.73	33153.7	8.28643e-09
117933	1554.63	0.211346	18	3528.09	224.32	27597.8	1.45635e-08
118622	1562.98	0.15772	13	6538.14	339.27	31104.1	4.71487e-09
119411	1572.65	0.191197	16	7425.85	360.94	45688.4	9.54095e-09
120091	1581.12	0.234772	19	6681.2	320.96	43873.7	1.26486e-08
120563	1587.14	0.312453	25	6489.44	312.13	45291	1.45635e-08
121486	1598.87	0.189527	15	10664.7	468.49	72587.9	1.26486e-08
123928	1631.14	0.251333	18	10502	411.95	62715.7	1.09854e-08
124588	1639.67	0.155079	12	4761.48	244.14	28298.1	9.54095e-09
125734	1654.12	0.251179	20	4365.43	234.35	33224.5	1.45635e-08
126472	1663.59	0.156377	11	4458.35	209.86	29159.8	1.45635e-08
127369	1676	0.23298	17	5587.26	244.3	36097	1.26486e-08
127565	1678.91	0.217169	14	4955.68	214.03	29395.3	1.26486e-08
127906	1683.95	0.261184	18	32039	989.39	177649	1.09854e-08
128004	1685.43	0.254079	16	4249.17	189.71	31838.2	2.223e-08
128241	1689.15	0.159274	10	5869.55	231.89	27879.7	9.54095e-09
128352	1690.86	0.24	16	9093.12	319.5	64774.6	2.223e-08
128742	1696.67	0.19	13	4863.67	204.3	26374.8	1.09854e-08
129546	1708.49	0.36	26	4441.52	203.4	30864.8	1.67683e-08
129728	1711.08	0.23	16	7890.85	304.5	44195	1.09854e-08
130241	1718.22	0.25	19	5260.23	239.6	34622.4	1.26486e-08
130932	1726.88	0.17	14	11645.7	486.8	78804.2	1.09854e-08
131251	1730.67	0.25	21	2929.06	194.8	25576.3	1.9307e-08
131345	1731.78	0.25	21	13748.8	580.8	113037	1.45635e-08
132172	1740.34	0.16	15	3810.2	265.8	36979.6	1.67683e-08
132757	1745.92	0.32	36	30737.8	1591.5	285688	1.09854e-08
132998	1748.07	0.16	18	4535.01	364.1	45108.9	1.26486e-08
133622	1753.53	0.17	21	9984.55	650.3	88833.9	8.28643e-09
134490	1760.53	0.17	22	2510.57	291.4	30245.9	1.26486e-08
134709	1762.16	0.2	27	7553.84	581.2	68467.5	7.19686e-09
135501	1767.4	0.12	18	3974.93	421.9	37561.2	5.42868e-09
135746	1768.98	0.2	33	9169.59	787.5	93879.7	6.25055e-09
136119	1771.18	0.14	25	2348.37	385.8	27050	6.25055e-09
136173	1771.48	0.12	21	5482.43	623.9	65410	7.19686e-09
136213	1771.7	0.13	23	3051.88	426.2	33317.1	5.42868e-09
136679	1774.35	0.18	33	1294.85	280	27220.1	2.223e-08
137033	1776.34	0.14	25	4580.84	534.1	44597.7	4.71487e-09
138011	1781.6	0.24	47	4710.43	565	73178.4	9.54095e-09
138257	1782.85	0.12	24	5990.76	691.5	62113.7	4.09492e-09
138471	1783.91	0.1	21	3369.13	505	33016.3	3.08884e-09
139607	1789.21	0.18	40	7108.1	859.7	112753	8.28643e-09
140053	1791.25	0.16	35	6056.75	754.2	100867	9.54095e-09
141836	1799.24	0.14	30	3675.19	511.8	51992.5	7.19686e-09
143232	1805.57	0.2	45	11487.7	1238.2	260212	1.67683e-08
143488	1806.71	0.14	31	3876.33	561.9	62293.9	8.28643e-09
143719	1807.79	0.15	32	1912.35	355.8	28060.4	7.19686e-09
143882	1808.55	0.12	27	2530.16	407.7	30314.7	4.71487e-09
144276	1810.33	0.18	39	7471.18	870.8	107852	7.19686e-09
144529	1811.48	0.15	33	1959.9	337.8	25811.4	5.42868e-09
144989	1813.68	0.23	49	2171.36	388.4	55815.3	2.223e-08
145967	1818.37	0.12	26	3431.03	495.5	40644.5	4.71487e-09
146170	1819.31	0.15	32	3689.96	538.8	38472.6	3.55648e-09
146663	1821.65	0.2	41	6628.23	719.8	117384	1.26486e-08
147923	1828.03	0.15	31	2736.54	407	31762.4	5.42868e-09
148922	1832.95	0.15	29	4805.48	515.6	70864.4	9.54095e-09
149230	1834.53	0.1	20	4399.67	489.4	44426.2	4.09492e-09
150216	1839.4	0.22	44	1249.33	255.4	27556.2	1.9307e-08
150629	1841.59	0.14	25	2581.42	321.5	27671.1	5.42868e-09
151888	1848.29	0.2	39	1861.72	288	27756	9.54095e-09
152274	1850.29	0.16	31	3710.3	430.9	46325.2	6.25055e-09
152433	1851.11	0.14	27	2953.32	373.5	43538	9.54095e-09
153294	1855.48	0.12	23	3961.46	445.5	51410.4	7.19686e-09
153398	1856.02	0.14	27	2027.08	306.2	27052.7	7.19686e-09
153499	1856.54	0.16	31	5944.39	585.3	113903	1.45635e-08
153892	1858.57	0.16	31	2900.4	364	26475.8	3.55648e-09
154224	1860.23	0.13	27	3255.3	412.3	34145.1	4.09492e-09
155889	1867.95	0.16	36	3342.04	486.2	45646.3	5.42868e-09
155959	1868.26	0.17	38	2952.61	459.4	35404.5	4.09492e-09
156351	1869.99	0.19	42	5074.45	598.6	77483.9	7.19686e-09
157600	1875.39	0.15	35	5661.64	676.3	107658	9.54095e-09
158214	1878.04	0.18	41	6208.66	719.7	92683.6	6.25055e-09
158942	1881.24	0.14	32	6017.05	679	98727.5	8.28643e-09
159711	1884.95	0.16	32	1747.66	287	35369.9	1.67683e-08
160986	1891.69	0.3	59	10600.7	917.3	231444	1.9307e-08
161178	1892.66	0.15	30	6247.7	644.8	96163.4	9.54095e-09
161309	1893.32	0.15	30	1884.01	300.2	28693.7	9.54095e-09
161488	1894.22	0.17	35	1951.06	315.7	35081.7	1.09854e-08
161703	1895.24	0.13	28	2153.96	332.8	25015	4.71487e-09
161977	1896.54	0.14	30	2000.82	313.4	29123.6	7.19686e-09
163085	1901.66	0.06	12	3646.71	432	29646.8	2.32995e-09
163505	1903.8	0.18	35	5061.21	498.5	84101.5	1.09854e-08
164067	1906.74	0.11	21	3164.2	384.3	33185	4.71487e-09
164152	1907.18	0.17	32	2615.88	372.3	35925.9	8.28643e-09
164590	1909.4	0.12	24	1908.76	326.1	25380.7	6.25055e-09
164768	1910.28	0.16	33	2504.73	360.7	38310.3	8.28643e-09
165121	1911.92	0.15	33	2032.93	351.3	35055.3	9.54095e-09
165535	1913.77	0.14	32	1752.53	356.3	28489.5	8.28643e-09
165569	1913.92	0.14	32	1745.01	384.7	28733	8.28643e-09
165647	1914.24	0.14	35	3253.39	531.6	47855.3	5.42868e-09
165819	1914.92	0.16	40	3852.97	575.2	60814.8	6.25055e-09
166047	1915.83	0.18	44	3498.94	489.1	52703.3	6.25055e-09
166727	1918.62	0.18	44	2870.27	492.8	61315.7	1.26486e-08
167140	1920.33	0.12	29	2512.66	418.2	30067.9	3.55648e-09
167405	1921.42	0.17	42	3161.81	456	61610.4	9.54095e-09
167571	1922.1	0.16	39	1945.55	330.9	29582.3	6.25055e-09
168432	1925.65	0.15	37	1660.46	302.7	26160.1	6.25055e-09
168568	1926.2	0.17	42	3796.25	499.7	66791.6	8.28643e-09
168859	1927.38	0.12	27	1954.22	320.8	29685.6	7.19686e-09
169861	1931.82	0.22	50	5900.22	636	124542	1.26486e-08
171493	1939.47	0.19	42	2091.1	318.8	37082.6	9.54095e-09
171792	1940.82	0.14	31	3247.51	419.6	54184	8.28643e-09
172291	1943	0.24	56	6495.64	704.3	167479	1.9307e-08
172644	1944.48	0.18	44	5081.32	613.5	110492	1.26486e-08
172992	1945.91	0.12	29	1902.97	327	28247.1	5.42868e-09
173337	1947.32	0.14	35	1598.07	294.3	25973.6	6.25055e-09
173864	1949.42	0.15	37	1811.54	327.4	32691.9	8.28643e-09
175886	1958.6	0.15	36	3246.26	427.2	53519.3	7.19686e-09
176519	1961.25	0.11	27	1989.54	358.5	25425.1	4.09492e-09
176941	1963	0.13	31	3163.34	427.8	44111.7	5.42868e-09
177791	1966.72	0.16	35	4994.7	547.9	67509.8	5.42868e-09
177995	1967.63	0.15	34	2075.74	338.8	27257.7	5.42868e-09
178452	1969.68	0.2	45	3397.36	442.9	74991.3	1.45635e-08
178649	1970.53	0.15	36	4631.45	560.5	67294.1	5.42868e-09
180042	1976.75	0.19	36	1537.75	262.1	31211.1	1.67683e-08
180645	1979.92	0.16	30	1721.27	275.2	32026.7	1.45635e-08
180893	1981.34	0.21	36	5359.85	469.2	94146.5	1.45635e-08
181431	1984.31	0.19	35	2245.77	278	37105.8	1.26486e-08
181935	1986.93	0.18	38	2819.35	353	54786.8	1.26486e-08
182424	1989.22	0.13	29	2653.75	388.6	26589.1	3.08884e-09
182976	1991.84	0.15	31	1929.02	299.9	34758.9	1.09854e-08
183692	1995.17	0.17	36	3957.38	467.9	67469.3	9.54095e-09
184041	1996.8	0.17	37	6600.68	661.3	122298	1.09854e-08
184073	1996.95	0.11	23	3125.74	402.6	40682.2	5.42868e-09
186134	2006.32	0.159	38.7553	5324.96	581.4	99079.9	9.54095e-09
187798	2013.7	0.077	16.9882	7430.76	721.6	51726.9	1.32571e-09
188068	2014.93	0.11	24	2387.9	339.7	29969.1	4.71487e-09
188565	2017.21	0.18	38	4308.14	481.8	61625.7	6.25055e-09
190374	2027.05	0.166	26.0706	8471.31	635.7	75550.1	3.55648e-09
190473	2027.6	0.209	37.1412	2175.32	267.4	38883.3	1.45635e-08
191128	2031.05	0.214	40.7805	1524.47	225.7	30312	1.67683e-08
196650	2057.62	0.175	36.1882	1205.53	218.3	25687.6	1.45635e-08
197193	2060.25	0.218	44.8148	10984.7	785.6	237132	1.9307e-08
197258	2060.57	0.2	40	1665	238.6	32447.1	1.67683e-08
200454	2078.26	0.196	30.4186	3113.1	241.1	48227.9	1.45635e-08
201784	2086.61	0.037	5.8	8493.51	490.9	31458.8	1e-09
202880	2093.43	0.263	41.8837	3687.32	283.7	82995.4	2.94705e-08
203377	2096.51	0.187	30.4598	1749.87	203.2	31107	1.9307e-08
203770	2098.89	0.211	41.3589	2977.92	292.9	51989.1	1.67683e-08
204286	2101.74	0.253	47.7176	2431.92	274.3	53838.6	2.223e-08
205664	2108.63	0.128	27.9186	1780.47	273.7	28526.2	9.54095e-09
206549	2112.98	0.2	40.25	2360.2	287.1	52483.2	2.223e-08
207456	2117.72	0.27	49.6667	5866.39	462.6	116981	1.9307e-08
207727	2119.24	0.25	45.1264	1593.46	214.1	35949.9	2.55955e-08
208193	2121.78	0.157	29.5161	1757.68	230.3	32407.3	1.67683e-08
209109	2126.89	0.186	33.954	2904.17	299.3	48393.8	1.45635e-08
212909	2150.15	0.137	21	2860.49	254.4	29763.2	7.19686e-09
213647	2154.89	0.153	27.7976	3029.05	261.2	53472.6	1.9307e-08
213764	2155.63	0.196	30.8333	2733.22	247.6	42868.9	1.45635e-08
215603	2167.03	0.27	46.0206	4424.99	307.4	75459.9	1.67683e-08
216011	2169.58	0.208	32.4632	4908.49	351.4	68839.3	1.09854e-08
216121	2170.3	0.144	25.0312	1782.53	202	27683.9	1.45635e-08
216479	2172.46	0.207	32.6939	4432.62	304.4	89116.9	2.55955e-08
216896	2175.14	0.204	28.9785	2771.37	205.7	36243.3	1.09854e-08
219672	2191.51	0.171	35.9783	2254.78	230.2	45292.1	1.45635e-08
220694	2196.32	0.139	29.0526	1949.76	228.1	33304.2	9.54095e-09
222080	2202.59	0.169	39.6907	1474.66	220.4	27226.6	8.28643e-09
222829	2205.62	0.11	27.3626	1900.09	289.8	34239	7.19686e-09
223376	2207.68	0.133	39.2478	1743.94	279.6	36051	9.54095e-09
223605	2208.53	0.161	44.7	1594.2	235.5	40336.8	1.26486e-08
224449	2211.5	0.126	31.7143	1884.38	298.6	33948.7	6.25055e-09
226958	2220.16	0.194	53.9355	5235.2	548	180951	2.94705e-08
226992	2220.29	0.088	24.5161	3050.42	395.5	53110.2	7.19686e-09
227200	2221.04	0.264	72.129	5089	478.1	209910	4.49843e-08
227347	2221.63	0.124	31.1613	1535.49	249.7	26315.1	8.28643e-09
227400	2221.84	0.142	35.6129	1799.28	261.3	35771.1	1.09854e-08
228313	2225.63	0.139	34.7234	3496.09	357.8	72228.7	1.09854e-08
229316	2229.32	0.106	30.8842	2335.13	323.9	31643.2	3.08884e-09
229957	2231.45	0.123	38.4624	1772.59	273.1	35312.3	7.19686e-09
230106	2231.93	0.124	38.4624	1424.66	242.9	32657.1	9.54095e-09
231396	2236.61	0.232	63.043	2915.84	370.4	102416	2.55955e-08
232913	2241.83	0.135	38.1031	2166.79	293.2	52527.3	1.26486e-08
234009	2245.91	0.194	51.7234	3466.03	375	88985.6	1.45635e-08
236686	2256.9	0.202	44.3667	1657.62	208.4	35463	1.45635e-08
240585	2275.89	0.17	34.2209	3449.37	251.8	46919.7	8.28643e-09
240798	2276.98	0.191	40.1047	3278.82	240	49753.9	1.09854e-08
241011	2278.19	0.235	40.4651	4051.84	266.8	92433.8	2.55955e-08
241236	2279.43	0.345	63.1059	4968.12	297.6	91353.7	1.67683e-08
242744	2288.58	0.102	15.4898	4698.82	224.2	34752.4	4.71487e-09
247662	2316.64	0.176	61.2745	4060.08	507.9	129433	1.67683e-08
251687	2329.42	0.103	38.1935	1372.69	324.2	29914	6.25055e-09
251814	2329.76	0.137	57.3763	1326.03	327.3	47317.4	1.67683e-08
252562	2331.81	0.109	38.5714	1525.35	331.1	31333.6	5.42868e-09
253025	2333.11	0.089	40.7702	1229.91	331.5	28405.9	6.25055e-09
253472	2334.26	0.108	41.8696	2055.91	380	43514.8	4.71487e-09
255347	2339.09	0.049	19.4848	3615.56	552.8	27063.6	1e-09
255380	2339.18	0.144	51.9596	8608.33	924.6	229024	8.28643e-09
256122	2341.19	0.11	39.1304	3152.44	485.4	79377.6	7.19686e-09
259555	2350.02	0.072	28.2174	2349.52	378.8	31626.4	2.02359e-09
260595	2352.74	0.073	27.6444	2233.36	355.3	31675.8	2.6827e-09
261006	2353.91	0.145	51.7333	1277.22	274.7	33002.9	8.28643e-09
262105	2356.81	0.056	21.6897	4589.82	540.3	60430	1.75751e-09
263142	2359.53	0.117	50.3303	1391.04	291.1	41924.1	1.09854e-08
263444	2360.41	0.137	49.2632	3124.4	414.7	93793.4	1.26486e-08
264899	2364.63	0.089	29.5652	1805.38	294.5	29049.2	3.55648e-09
265458	2366.32	0.105	33.9355	2412.97	322.1	46000.5	5.42868e-09
265718	2367.15	0.124	39.5914	1740.82	273.9	49588.5	1.45635e-08
267820	2374.05	0.106	33.5745	2010.6	305.3	40453.4	6.25055e-09
270295	2381.31	0.143	49.9341	1552.37	276.5	35856.4	6.25055e-09
271824	2385.66	0.137	45.8462	7178.19	752.8	201940	9.54095e-09
272561	2387.7	0.052	19.3548	2837.88	422.8	35312.6	1.75751e-09
274664	2393.4	0.107	41.0667	4433.58	545.1	91853.9	4.71487e-09
275042	2394.39	0.068	25.9149	2047.1	375.1	30974.7	2.32995e-09
275353	2395.19	0.117	45.3511	1605.51	320	32349.3	4.71487e-09
276240	2397.67	0.071	26.0435	1964.31	337.5	30481.5	2.6827e-09
276318	2397.89	0.09	32.5543	2672.92	403.9	42177.3	2.6827e-09
276351	2397.98	0.054	19.5326	4119.21	495.9	40613	1e-09
276390	2398.08	0.125	45.5761	1216.97	283.1	25338.2	4.71487e-09
277084	2400.02	0.12	42.6632	1271.94	250.8	32864.8	7.19686e-09
277595	2401.45	0.068	24.9263	2489.76	371.2	25663.6	1.1514e-09
278189	2403.08	0.13	48.6818	2810.03	413.2	64836.7	6.25055e-09
278892	2405.08	0.14	43.4615	1706.23	307.9	32485.5	4.09492e-09
279549	2406.88	0.089	33.3152	3790.8	502.8	62929.6	3.08884e-09
279609	2407.04	0.089	33.3152	3584.74	486.7	55750.9	2.6827e-09
279818	2407.62	0.053	19.1613	2944.41	401	32832.2	1.32571e-09
280785	2410.34	0.158	57.8571	1441.49	300.7	42853.4	1.26486e-08
283546	2418.7	0.21	66.75	1206.23	269.3	47338.9	2.223e-08
284695	2422.34	0.165	49.8913	1522.73	280.3	54939.6	1.9307e-08
284895	2423.01	0.159	49.8913	3122.94	365	72951.6	8.28643e-09
293185	2451.16	0.09	30.0543	3772.1	414.1	39845.4	1.32571e-09
293365	2451.71	0.238	84.1522	2195.21	371.2	133713	4.49843e-08
293395	2451.79	0.17	60.1087	2976.16	394.9	100165	1.26486e-08
294109	2453.75	0.101	35.8776	1296.82	274.7	29357.9	6.25055e-09
294438	2454.68	0.161	53.8163	2275.73	367.8	75949.3	1.26486e-08
294772	2455.61	0.069	25.8925	2063.32	308	31388.2	2.6827e-09
297412	2463.27	0.12	43.2526	1840.16	301.8	35306.4	4.09492e-09
299414	2468.8	0.176	59.4624	1275.8	244.7	33205	9.54095e-09
299628	2469.46	0.088	29.7312	1630.57	302.4	25552.8	3.55648e-09
300896	2473.06	0.175	64.9474	1547	279.3	51514.3	1.26486e-08
310293	2497.72	0.085	38.8021	1430.7	284.7	35755.9	6.25055e-09
321166	2524.76	0.111	37	8872.51	637.5	93620.2	1.52642e-09
322418	2527.98	0.072	27.2644	6040.58	423.6	81911.8	3.08884e-09
329567	2552.22	0.071	18.1538	2912.02	216.8	26212.3	2.32995e-09
331881	2561.27	0.105	25.8947	1743.92	168.5	30121.4	8.28643e-09
344326	2603.44	0.091	56.5341	3748.5	534.5	86671.5	2.6827e-09
344383	2603.53	0.055	33.9205	3168.7	491.5	56887.6	1.52642e-09
344428	2603.61	0.055	33.9205	3262.49	494.1	55162.7	1.32571e-09
344930	2604.46	0.094	54.1954	2577.73	391.9	63884.9	3.08884e-09
345787	2605.97	0.093	52.7528	1560.75	308	27385.1	1.52642e-09
345998	2606.34	0.149	84.4045	3189.25	469.2	150667	1.09854e-08
346807	2607.78	0.113	62.7586	1387.84	286.4	42398.1	4.71487e-09
347833	2609.64	0.113	61.6552	976.045	258.8	28080.7	4.71487e-09
348364	2610.68	0.234	101.034	3904.57	514.8	220077	1.67683e-08
348526	2610.99	0.073	40.4138	2113.42	319.3	46140.9	2.6827e-09
348788	2611.46	0.091	50.5172	1629.34	392.4	41358.7	3.55648e-09
349547	2612.88	0.091	47.6374	1045.08	250.9	27524	4.09492e-09
350314	2614.35	0.092	45.9341	1648.15	282.6	32380.8	2.32995e-09
350415	2614.55	0.129	64.3077	1484.15	268.5	37030.2	4.09492e-09
353263	2620.15	0.147	87.7471	932.332	234	47183	1.45635e-08
353735	2621.05	0.075	38.5169	1428.77	290.1	25580.6	1.75751e-09
354921	2623.37	0.129	65.0769	2418.38	340.3	60927.6	3.55648e-09
356107	2625.6	0.055	32.4886	1612.34	305.7	28701.3	1.52642e-09
356161	2625.69	0.093	54.1477	1358.79	301.9	28686.6	2.02359e-09
356378	2626.06	0.074	43.3182	1902.85	336.1	49292.3	3.08884e-09
356497	2626.29	0.115	54.1477	1437.73	302.3	26018.6	1.52642e-09
357982	2628.87	0.076	43.6279	1971.59	339.9	36084.2	1.52642e-09
358893	2630.45	0.092	53.1868	1058.26	299.9	26119.7	2.6827e-09
360156	2632.61	0.053	31.1209	2937.06	444.8	45576.4	1.1514e-09
360208	2632.7	0.105	62.2418	1457.48	332.3	50666.7	5.42868e-09
360488	2633.23	0.133	72.6154	1480.5	305.9	43116.9	4.09492e-09
362664	2637.12	0.112	61.4651	2516.1	372.3	65538.3	3.55648e-09
363094	2637.95	0.076	40.9767	1476.48	326.6	36223.8	3.08884e-09
363516	2638.75	0.075	39.4091	2183.91	386.3	41845.4	2.02359e-09
364028	2639.74	0.129	68.9659	2353.65	383.4	65065.6	4.09492e-09
365602	2642.66	0.074	41.9091	1994.27	351.1	33402.6	1.32571e-09
367249	2645.7	0.056	30.75	1498.15	323.2	27990.7	1.75751e-09
368111	2647.3	0.13	69.9205	1722.53	352.3	79001	1.09854e-08
369566	2649.95	0.072	40.9438	1874.21	323.5	36321	1.75751e-09
370729	2652.09	0.092	48.764	1477.71	272.7	32746.9	2.6827e-09
373863	2658.42	0.142	72.7033	1098.66	244.8	34728.3	6.25055e-09
376964	2664.04	0.095	52.4138	1870.63	301.4	37416.6	2.02359e-09
378209	2666.33	0.111	60.4773	1229.82	299.2	41163.9	6.25055e-09
389176	2688.04	0.113	68.8966	1199.19	238.2	27387.4	2.6827e-09
389853	2689.17	0.094	57.4138	1487.54	242	38832.2	3.55648e-09
390593	2690.45	0.058	31.9655	1318.08	221.2	25884.7	2.32995e-09
390966	2691.11	0.075	42.2874	1035.63	200.7	26860.9	4.09492e-09
393701	2696.38	0.052	23.9681	4873.29	347.4	73632	2.02359e-09
393885	2696.8	0.071	31.9574	2552.98	239.9	38655.1	2.02359e-09
397361	2705.14	0.07	26.8817	5317.25	306.3	55094.5	1.32571e-09
408115	2737.2	0.091	30	3554.78	222.7	30447.8	1.1514e-09
411056	2745.54	0.09	35.2273	5322.66	272.5	48494.8	1.1514e-09
412711	2749.71	0.054	23.5281	9283.81	416.5	79117.2	1e-09
419572	2765.14	0.11	53.5909	1839.06	208.4	33534.4	3.55648e-09
422081	2769.98	0.075	41.7727	2855.88	221.2	45985.8	2.02359e-09
430452	2783.22	0.093	85.618	1809.36	284.2	67084.7	3.55648e-09
430894	2783.66	0.074	89.2414	1232.34	253.4	46214.6	3.08884e-09
431273	2784	0.093	111.552	740.351	224.5	38611.9	5.42868e-09
431519	2784.2	0.074	89.2414	1899.81	371.7	76542.5	3.08884e-09
433070	2785.46	0.057	78.9767	691.436	274.1	32288.7	3.55648e-09
433570	2785.84	0.057	78.9767	663.303	265.6	25608.8	2.32995e-09
434649	2786.61	0.044	52.6512	1707.49	381.5	45363.7	1.1514e-09
435512	2787.25	0.057	78.1047	1176.12	338.6	58333.2	3.55648e-09
437394	2788.62	0.058	81.3176	3025.33	573.1	133151	2.6827e-09
437611	2788.77	0.058	81.3176	936.66	296.2	29511.9	1.52642e-09
438559	2789.49	0.077	108.424	1281.64	411.4	45493.4	1.75751e-09
438939	2789.75	0.058	81.3176	1095.56	349.7	36751.7	1.52642e-09
440997	2791.19	0.057	81.2093	639.1	289.1	26810.4	2.32995e-09
441240	2791.38	0.058	81.2093	959.685	353.2	41246.1	2.32995e-09
441951	2791.87	0.058	85.9765	853.635	310.7	40110.8	2.6827e-09
442438	2792.2	0.078	114.635	1390.18	364	50494.3	1.75751e-09
443040	2792.63	0.058	85.9765	938.138	303.8	30029	1.52642e-09
446711	2795.28	0.074	89.1818	1487.96	299.2	70027.3	4.71487e-09
447112	2795.63	0.059	44.5909	2079.4	334.5	42018.8	1e-09
448004	2796.39	0.055	66.8864	825.914	237.4	25749.4	2.32995e-09
448942	2797.21	0.074	78.7273	1064.15	260.2	36697.8	3.08884e-09
449375	2797.62	0.056	59.0455	1636.71	286.6	39795.1	1.52642e-09
449532	2797.76	0.074	78.7273	1014.04	263.1	33457.8	2.6827e-09

## Sheet: Table S2 - Time-binned Deff
Time bin mid-age (ka)	Median Deff (m2 yr-1)	Median absolute deviation (m2 yr-1)
5	2.44205e-07	1.65145e-07		Deff = Effective diffusion rate
15	1.04811e-07	3.61464e-08
25	3.90694e-08	1.70204e-08		Table S2: Median effective diffusion rates modelled for each time bin along EPICA Dome C.
35	3.39322e-08	5.13718e-09		Rhodes et al., submitted to Climate of the Past, Jan 2024.
45	1.67683e-08	4.11978e-09
55	1.45635e-08	4.88301e-09
65	9.54095e-09	2.3441e-09
75	1.09854e-08	1.66314e-09
85	9.54095e-09	1.34949e-09
95	9.54095e-09	1.89428e-09
105	9.54095e-09	1.44446e-09
115	1.02632e-08	2.38537e-09
125	1.26486e-08	1.78904e-09
135	8.28643e-09	2.85775e-09
145	7.19686e-09	2.3441e-09
155	7.19686e-09	2.3441e-09
165	8.28643e-09	2.03588e-09
175	6.7237e-09	1.42888e-09
185	1.02632e-08	4.15647e-09
195	1.56659e-08	1.10242e-09
205	1.80377e-08	3.83324e-09
215	1.45635e-08	3.57807e-09
225	8.91369e-09	1.89428e-09
235	1.45635e-08	1.91493e-09
245	1.38769e-08	4.24095e-09
255	6.25055e-09	1.53569e-09
265	6.25055e-09	3.56786e-09
275	3.08884e-09	1.62602e-09
285	1.59778e-08	4.79071e-09
300	7.89575e-09	4.7528e-09
320	2.7094e-09	7.81213e-10
340	3.55648e-09	1.15839e-09
360	2.50632e-09	9.79906e-10
380	3.11959e-09	7.66445e-10
400	2.02359e-09	5.0212e-10
420	1.58749e-09	5.11795e-10
440	2.32995e-09	7.58892e-10
